# Supplementary material
Source: PubMed Central journal article supplement (PMC2741319)

## Supplemental Data

### Multimegabase Silencing in Nucleolar Dominance

### Involves siRNA-Directed DNA Methylation

### and Specific Methylcytosine-Binding Proteins

Sasha B. Preuss, Pedro Costa-Nunes, Sarah Tucker, Olga Pontes, Richard J. Lawrence, Rebecca Mosher, Kristin D. Kasschau, James C. Carrington, David C. Baulcombe, Wanda Viegas, and Craig S. Pikaard

#### S1 nuclease protection assay conditions

For S1 nuclease protection assays, RNA was mixed with 5' end-labeled probe DNA and incubated at 37°C overnight in hybridization buffer (40 mM PIPES pH 6.4, 400 mM NaCl, 1 mM EDTA, 80% deionized formamide). 150 units of S1 nuclease (Invitrogen) in digestion buffer (5% glycerol, 1 mM ZnSO<sub>4</sub>, 30 mM sodium acetate, 50 mM NaCl) was then added and incubated at 37°C for 45 minutes. Reactions were stopped with 0.3% SDS, 8 mM EDTA. Nucleic acids were ethanol precipitated and subjected to electrophoresis on 10% polyacrylamide/7M Urea sequencing gels. Dried gels were subjected to phosphorimaging.

**Small RNA library details.** Small RNA sequences analyzed in Figure 2 were determined by 454 sequencing. The library used to generate Figure 2C was generated using 15-30 nt RNAs isolated from floral tissue. Its construction, sequencing and analysis is described in Mosher et al, 2008. The libraries used to generate Figure 2D, comparing *A. thaliana* wild-type (ecotype Col-0) and *dcl3-1* mutants are described in Kasschau et al., 2007. These siRNA sequence data are available at the Arabidopsis small RNA project

(ASRP) website (<http://asrp.cgrb.oregonstate.edu/db/>). For wild type Col-0, a total of 78,583 small RNAs were sequenced. For *dcl3-1*, 30,318 small RNAs were sequenced. Both libraries were generated using RNA from inflorescence tissue. The entire 454 sequencing data set has the GEO (Gene Expression Omnibus) series number GSE6682. The GEO sample numbers for the data sets used in Figure 2D are GSM154336 (Col-0, inflorescence tissue; stage 1-12 flowers) and GSM154363 (*dcl3-1*, inflorescence tissue, stage 1-12 flowers).

**Table S1.** Members of the Arabidopsis DNA methyltransferase gene family, their expression status and the specific genes targeted for knockdown using RNAi

| Plant homology group <sup>1</sup> | Gene  | Gene locus identifier | Expressed | Mammalian homolog | RNAi target |
|-----------------------------------|-------|-----------------------|-----------|-------------------|-------------|
| I                                 | MET1  | At5g49160             | Yes       | DNMT1             | Yes         |
| I                                 | MET2  | At4g14140             | Yes       | DNMT1             | Yes         |
| I                                 | MET2b | At4g08990             | No        | DNMT1             | No          |
| I                                 | MET3  | At4g13610             | Yes       | DNMT1             | Yes         |
| II                                | CMT1  | At1g80740             | Yes       | Plant specific    | Yes         |
| II                                | CMT2  | At4g19020             | Yes       | Plant specific    | Yes         |
| II                                | CMT3  | At1g69770             | Yes       | Plant specific    | Yes         |
| III                               | DRM1  | At5g15380             | No        | DNMT3             | Yes         |
| III                               | DRM2  | At5g14620             | Yes       | DNMT3             | Yes         |
| III                               | DMT10 | At3g17310             | No        | DNMT3             | No          |
| IV                                | DMT11 | At5g25480             | No        | DNMT2             | No          |

**Table S2.** Genes of the Arabidopsis methyl-CpG-binding domain protein family, their expression status and specific genes targeted for knockdown using RNAi

| Plant Homology Group <sup>1</sup> | Gene  | Accession number | Expressed | RNAi target |
|-----------------------------------|-------|------------------|-----------|-------------|
| I                                 | MBD10 | At1g15340        | Yes       | Yes         |
| I                                 | MBD11 | At3g15790        | Yes       | Yes         |
| II                                | MBD1  | At4g22745        | Yes       | Yes         |
| II                                | MBD3  | At4g00416        | No        | No          |
| II                                | MBD4  | At3g63030        | Yes       | Yes         |
| III                               | MBD2  | At5g35330        | Yes       | Yes         |
| III                               | MBD12 | At5g35338        | No        | No          |
| IV                                | MBD5  | At3g46580        | Yes       | Yes         |
| IV                                | MBD6  | At5g59380        | Yes       | Yes         |
| V                                 | MBD9  | At3g01460        | Yes       | Yes         |
| VI                                | MBD7  | At5g59800        | Yes       | Yes         |
| VII                               | MBD8  | At1g22310        | Yes       | Yes         |
| VIII                              | MBD13 | At5g52230        | No        | No          |

<sup>1</sup>Homology groups are based on: Nathan M. Springer and Shawn M. Kaeppler (2005) Evolutionary Divergence of Monocot and Dicot Methyl-CpG-Binding Domain Proteins. *Plant Physiol.* 138: 92–104.

**Table S3:** Oligonucleotides used in Fig. 2A as probes to detect promoter siRNAs in *A. thaliana*. Numbers refer to positions relative to the 45S rRNA transcription start site (+1). Sequences shown were all followed by the sequence: CCTGTCTC, which serves as an adapter for probe generation using the mirVana probe kit.

| <b>Probe</b>               | <b>Sequence</b>                                     |
|----------------------------|-----------------------------------------------------|
| Atr(-150-100)<br>sense     | TACCAGAAAATAGGATTTAGTATCCTTATGATGCATGCCAAAAAGAATTT  |
| Atr(-150-100)<br>antisense | AAATTCTTTTTGGCATGCATCATAAGGATACTAAATCCTATTTTTCTGGTA |
| Atr(-100-50)<br>sense      | TCAAATTCCAAGTATTTCTTTTTTCTTGGCACCGGTGTCTCCTCAGACAT  |
| Atr(-100-50)<br>antisense  | ATGTCTGAGGAGACACCGGTGCCAAGAAAAAGAAATACTTGGAAATTTGA  |
| Atr(-50+1)<br>sense        | TTCAATGTCTGTTGGTGCCAAGAGGGAAAAGGGCTATTAAGCTATATAGG  |
| Atr(-50+1)<br>antisense    | CCTATATAGCTTAATAGCCCTTTTCCCTCTTGGCACCAACAGACATTGAA  |
| Atr(+1+50)<br>sense        | GGGGTGGGTGTTGAGGGAGTCTGGGCAGTCCGTGGGGAACCCCTTTTTTC  |
| Atr(+1+50)<br>antisense    | GAAAAAGGGGGTTCCCCACGGACTGCCCAGACTCCCTCAACACCCACCCC  |
| Atr(+50+100)<br>sense      | GGTTCGGACTTGGGTAGCGATCGAGGGATGGTATCGGATATCGGCACGAG  |
| Atr(+50+100)<br>antisense  | CTCGTGCCGATATCCGATACCATCCCTCGATCGCTACCCAAGTCCGAACC  |
| Atr(+100+150)<br>sense     | GAATGACCGACCGTCCGGCCGCGGGATTTTCGCCGGA AAACTTTTTCCGG |
| Atr(+100+150)<br>antisense | CCGGAAAAGTTTTCCGGCGAAAATCCCGGCGGCGGACGGTCGGTCATTC   |

**Table S4:** Oligonucleotides used in Figures 3E and 3J as probes for siRNA blot hybridization in *A. suecica* WT and transgenic lines. Sequences shown were followed by the sequence: CCTGTCTC, which serves as an adapter for probe generation using the mirVana probe kit.

| <b>Probe</b> | <b>Position</b>                  | <b>Sequence</b>                                        |
|--------------|----------------------------------|--------------------------------------------------------|
| At 45S prom  | -46 to -10                       | AATAGCCCTTTTCCCTCTGGCACCAACAGACATTG                    |
| Aa 45S prom  | -46 to -10                       | TTTGTCCATTTTTGGGTCTGGCACCAAGTGGAGATGC                  |
| siR1003      | (5S rRNA)                        | AGACCGTGAGGCCAAACTTGGCAT                               |
| pHell-DCL3   | ( <i>A.s.</i> <i>DCL3</i> -RNAi) | AGACAGAAGCCTTGACAAGCTTCCTGACCAAGTAAA<br>GGTCCATCTCAACT |
| pHell-RDR2   | ( <i>A.s.</i> <i>RDR2</i> -RNAi) | ATCTGAGTCTTGACAAAGAAGACAGGATCATAACAT<br>ATAGAACTTTGCTG |

**Table S5:** PCR primers used in Figures 3A and 3F to evaluate *RDR2* and *DCL3* mRNA levels in *A.suecica* wild-type, *RDR2*-RNAi and *DCL3*-RNAi lines.

|             | <b>Forward (5'→3')</b>   | <b>Reverse (5'→3')</b>   |
|-------------|--------------------------|--------------------------|
| <b>RDR2</b> | GATTGATGCATTCTTCTCAAGCTG | GCATTTGCGGGAAGCTTGCTCC   |
| <b>DCL3</b> | TCATCTTCATCGGCTGCAGGTTC  | TGGTTCTGTCTTCACAACCATCTC |
| <b>PFK</b>  | CGCCGGAATTTGATCAATCCT    | CGCCACGAAAACCAAACAGAC    |

**Figure S1.** *DDMI* knockdown has no effect on nucleolar dominance.

A. Centromere repeat methylation assay using the methylation sensitive restriction endonucleases *MspI* (M) or *HpaII* (H) and Southern blot hybridization using a 180 bp centromere repeat probe. Genomic DNA isolated wild-type *A. suecica* (A.s.) or two independent *DDMI*-RNAi lines is compared. Note the increased *HpaII* digestion in the RNAi lines.

B. *DDMI* knockdown does not depress the silenced *A. thaliana*-derived rRNA genes in *A. suecica*. RNA was isolated from *A. thaliana*, *A. arenosa*, wild-type *A. suecica*, *A. suecica* plants grown on media containing 10 ug/ mL of 5-aza-2' deoxycytosine (aza-dC), or five independent *A. suecica DDMI*-RNAi lines. Equal aliquots of purified RNA were then subjected to S1 nuclease protection using probes specific for *A. thaliana* or *A. arenosa* rRNA gene transcripts initiated at the transcription start sites (+1) of their respective promoters. Note that aza-dC causes a dramatic increase in transcription from both the *A. thaliana* and *A. arenosa*-derived rRNA genes, unlike *DDMI* knockdown.

A. Loss of centromere methylation

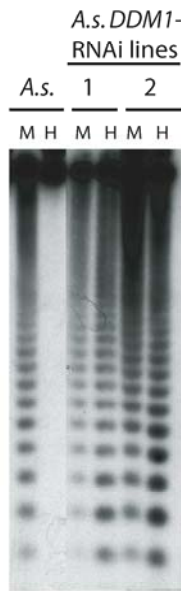

B. S1 nuclease protection assay

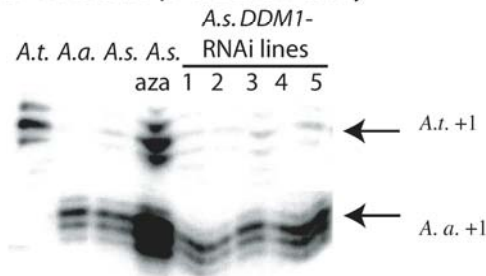



**Figure S3. Size distributions and relative abundance of sequenced small RNAs matching the intergenic spacer (IGS), external transcribed spacer (ETS) or rRNA gene coding regions.** IGS small RNAs correspond almost exclusively to the sizes of siRNAs produced by the four Dicer endonucleases: 21, 22, 23 and 24 nt. By contrast, small RNAs corresponding to regions encompassed by rRNA gene primary transcripts, namely the ETS and 18S-5.8S-25S rRNA coding regions, are heterogeneous in size. Pre-rRNA processing and rRNA degradation products are likely to constitute most of the ETS and coding region small RNAs.

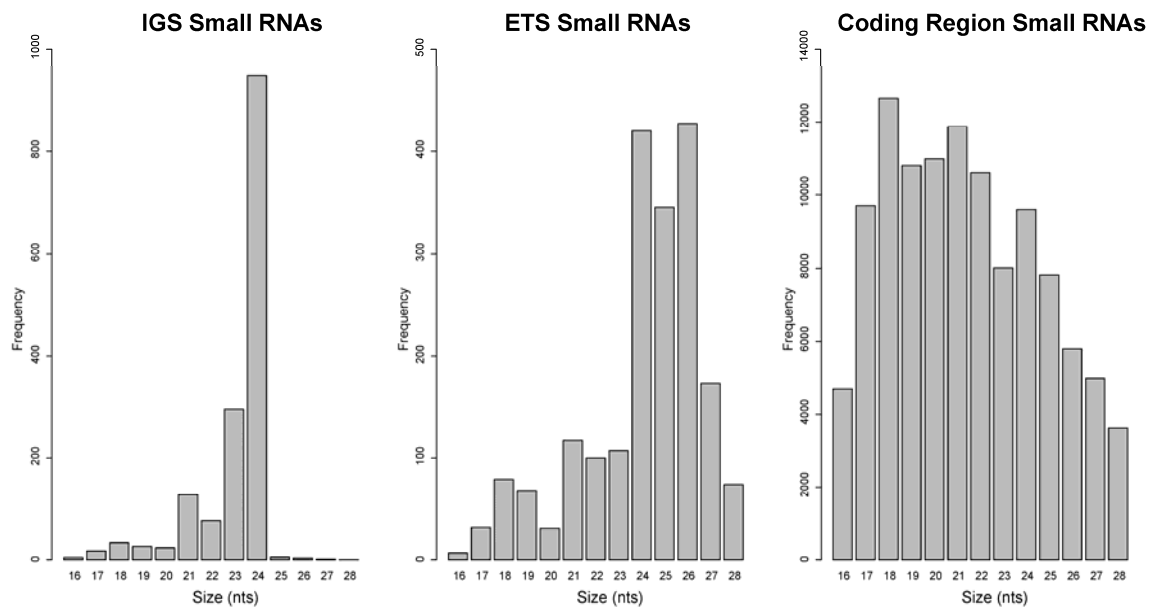



**Figure S4. Localization of MBD6-YFP in *A. thaliana* nuclei.**

MBD6-YFP recombinant protein expressed in transgenic plants was localized using anti-YFP antibody (green signals). NORs were localized using an rRNA gene probe (red signals). DNA was counterstained with DAPI (blue signals). The nucleolus, in which active rRNA genes are transcribed, appears as a black hole following DAPI staining. Inactive rRNA genes within NORs are highly condensed and localize at the outer edge of the nucleolus. Note that although there are four NORs in *A. thaliana*, they tend to coalesce, such that fewer than four NOR signals are typically observed by FISH. In the nuclei shown, either two or three NOR signals are apparent.

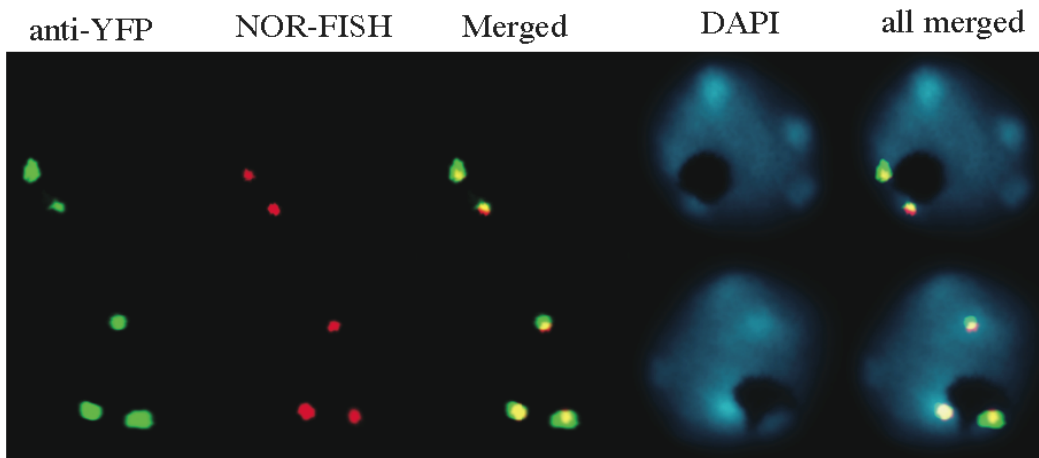

**Figure S5.** Comparison of siRNA levels in wild-type (WT), *DRM2*-RNAi and *MBD6*-RNAi lines of *A. suecica*. The RNA blots show siRNAs corresponding to the *A. thaliana* or *A. arenosa* 45S rRNA gene promoters or 5S rRNA gene spacers. The micro RNA, miR163 and ethidium-bromide stained 5S rRNA serve as loading controls.

Note that RNAi-mediated knockdown of *DRM2* in *A. suecica* causes decreased siRNA production, consistent with the decreases in DCL3-dependent siRNAs that have been reported previously in *A. thaliana* *drm1 drm2* mutants (e.g. see Pontes et al., 2006). The current interpretation is that *de novo* methylation influences the production of aberrant transcripts that serve as siRNAs. In *MBD6*-RNAi lines, siRNA levels are not decreased, but are slightly increased relative to wild-type (Fig. 6C), suggesting that in the absence of *MBD6*, production of aberrant transcripts from methylated DNA may be increased.

siRNAs in *DRM2*-RNAi and *MBD6*-RNAi lines

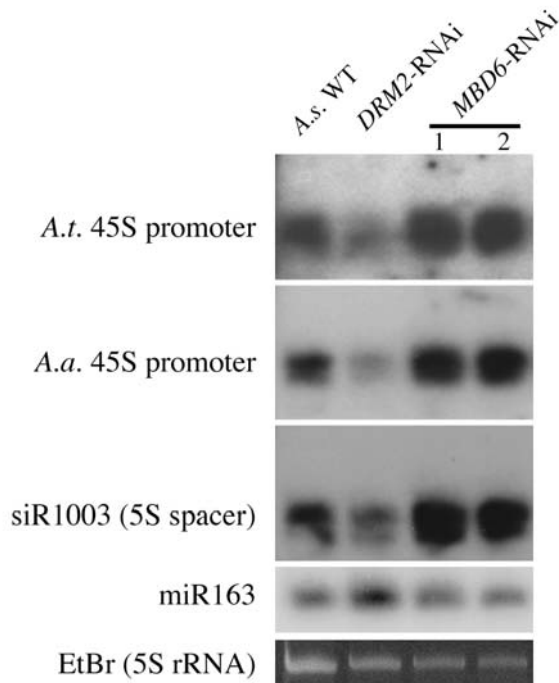

Supplement: NIHMS83647-supplement-01.pdf [file NIHMS83647-supplement-01.pdf]
